# Supplementary material for: Hydrates of adenosine 3′,5′-cyclic monophosphate sodium and their transformation
Source: Royal Society of Chemistry journal article supplement (doi:10.1039/d0ce01180k), 2020-10-15
Supplement: d0ce01180k1.pdf [file d0ce01180k1.pdf]

## Support Information

# Hydrates of Adenosine 3',5'-Cyclic Monophosphate Sodium and Their Transformation

*Pengpeng Yang<sup>a</sup>, Junyang Jin<sup>a</sup>, Qingshi Wen<sup>b</sup>, Chenguang Lin<sup>a</sup>, JinQiu Fu<sup>c</sup>, Wei Zhuang<sup>a</sup>, Jinglan Wu<sup>a</sup>,*

*Dong Liu<sup>a\*</sup>, Chenjie Zhu<sup>a\*</sup>, and Hanjie Ying<sup>a</sup>*

*<sup>a</sup>National Engineering Technique Research Center for Biotechnology, State Key Laboratory of Materials-Oriented Chemical Engineering, and College of Biotechnology and Pharmaceutical Engineering, Nanjing Tech University, Nanjing 210009, China*

*<sup>b</sup>Industrial Biotechnology Institute of Jiangsu Industrial Technology Research Institute, Nanjing, China*

*<sup>c</sup>School of Chemical Engineering, Zhengzhou University, Zhengzhou 450001, China*

## Table of contents

Figure S1. H-bond network pictures of water inclusion for the Forms I-IV.

Figure S2. The crystal packing diagrams for the Forms I-IV.

Figure S3. Sodium coordination spheres for the Forms I-IV.

Figure S4. Arrangement profiles of the host molecule packing for the Forms I-IV.

Figure S5. Comparison of the PXRD patterns of sample used in experiments and simulated lines from single-crystal structure.

Table S1. The sodium ions coordination for the Forms I-IV.

Table S2. The hydrogen bond information of the Forms I-IV.

The Crystallographic data of Form III and Form IV for the cAMPNa refers to our previous report<sup>1</sup>.

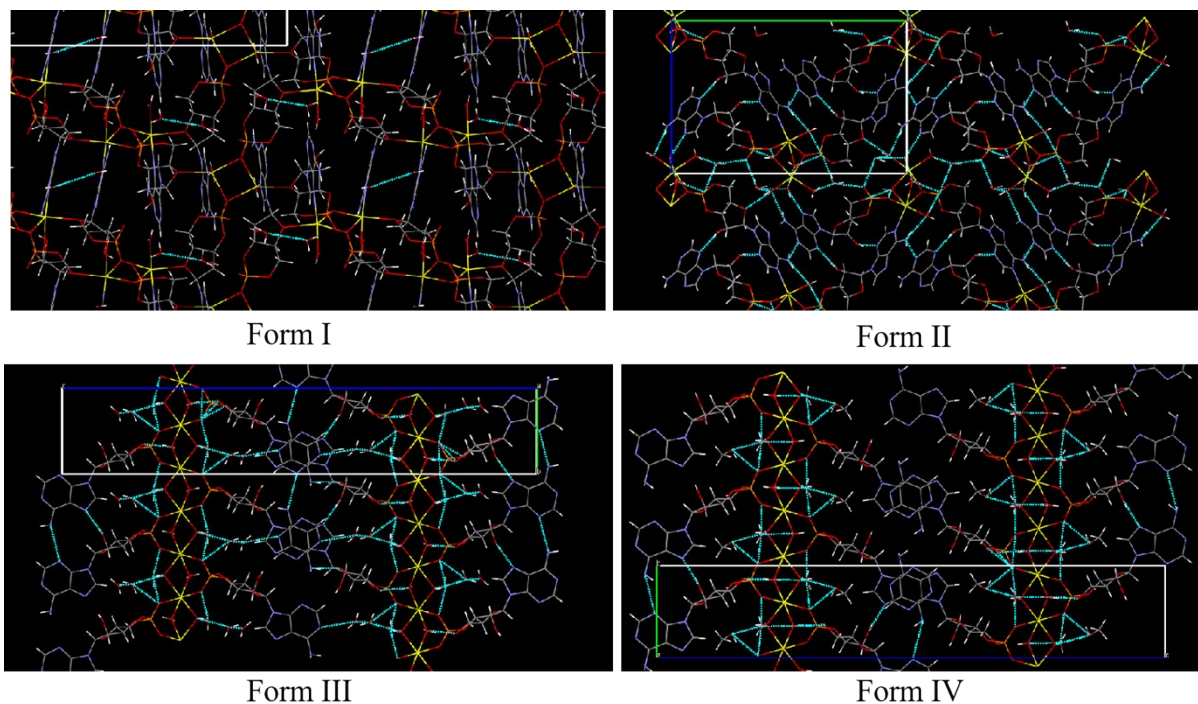

Figure S1. H-bond network pictures of water inclusion for the Forms I-IV. Cyan dash line denotes the hydrogen bond interaction. Yellow dots indicate the sodium ions.

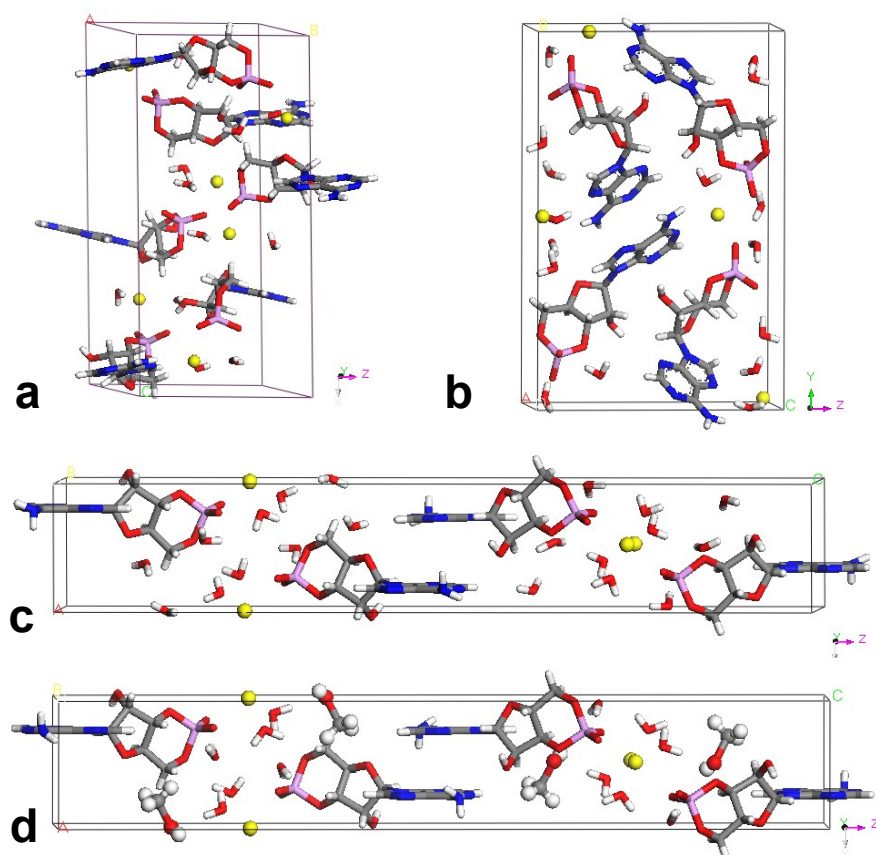

**Figure S2.** The crystal packing diagrams for the Forms I-IV.

(a) Form I, (b) Form II, (c) Form III, (d) Form IV

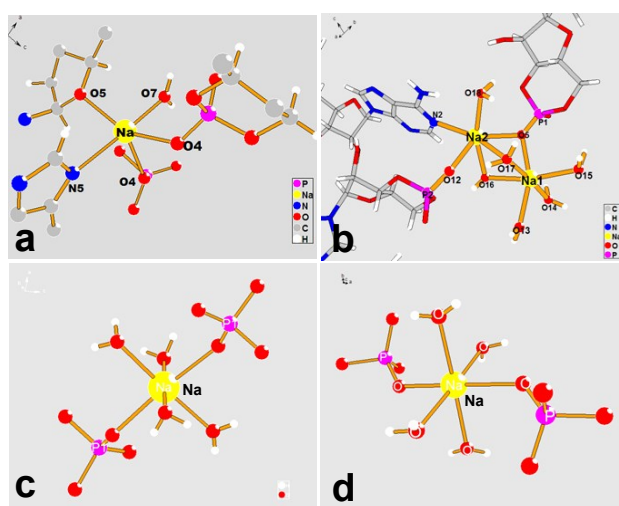

**Figure S3.** Sodium coordination spheres for the Forms I-IV.

(a) Form I, (b) Form II, (c) Form III, (d) Form IV

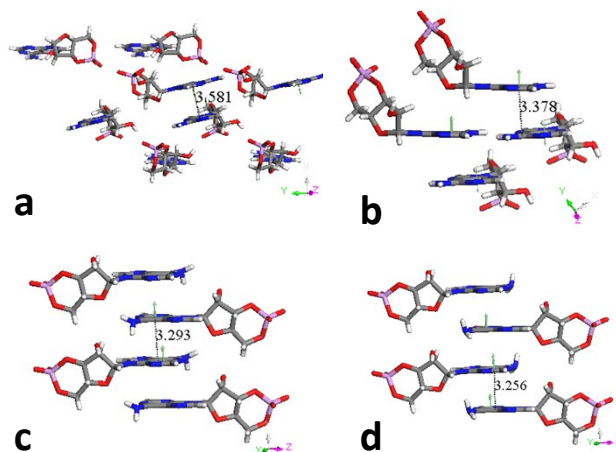

**Figure S4.** Arrangement profiles of the host molecule packing for four cAMPNa crystal forms. (a) Form I, (b) Form II, (c) Form III, (d) Form IV

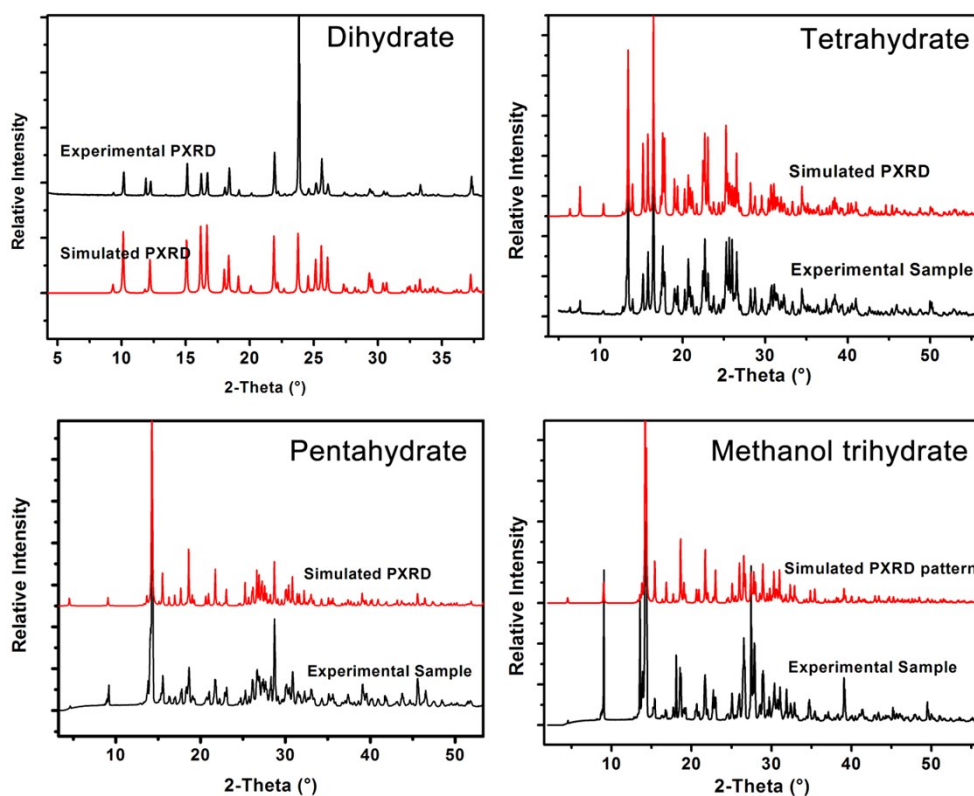

**Figure S5.** Comparison of the PXRD patterns of sample used in experiments and simulated lines from single-crystal structure.

**Table S1.** The sodium ions coordination for the Forms I-IV.

| Coordination                                | Bond length(angstrom) | Acceptor      |
|---------------------------------------------|-----------------------|---------------|
| cAMPNa·2H <sub>2</sub> O                    |                       |               |
| Na -O4                                      | 2.311(5)              | (P -O)        |
| Na -O7                                      | 2.375(7)              | crystal water |
| Na -N5_b                                    | 2.555(7)              | base          |
| Na -O5_f                                    | 2.434(4)              | ribose rings  |
| Na -O4_h                                    | 2.338(5)              | (P -O)        |
| cAMPNa·4H <sub>2</sub> O                    |                       |               |
| Na1 -O5                                     | 2.375(2)              | (P -O)        |
| Na1 -O13                                    | 2.413(2)              | crystal water |
| Na1 -O14                                    | 2.378(2)              | crystal water |
| Na1 -O15                                    | 2.387(2)              | crystal water |
| Na1 -O16                                    | 2.455(2)              | crystal water |
| Na1 -O17                                    | 2.366(2)              | crystal water |
| Na2 -O5                                     | 2.393(2)              | (P -O)        |
| Na2 -O12                                    | 2.664(2)              | (P -O)        |
| Na2 -O16                                    | 2.340(2)              | crystal water |
| Na2 -O17                                    | 2.728(2)              | crystal water |
| Na2 -O18                                    | 2.394(2)              | crystal water |
| Na2 -N2_a                                   | 2.531(2)              | base          |
| cAMPNa·5H <sub>2</sub> O                    |                       |               |
| Na1 -O9                                     | 2.461(5)              | crystal water |
| Na1 -O10                                    | 2.368(4)              | crystal water |
| Na1 -O5_a                                   | 2.372(4)              | (P -O)        |
| Na1 -O6                                     | 2.359(3)              | (P -O)        |
| Na1 -O9_a                                   | 2.483(5)              | crystal water |
| Na1 -O10_a                                  | 2.413(4)              | crystal water |
| cAMPNa·CH <sub>3</sub> OH·3H <sub>2</sub> O |                       |               |
| Na1 --O4                                    | 2.383(3)              | (P -O)        |
| Na1 --O8                                    | 2.370(3)              | crystal water |
| Na1 --O11                                   | 2.483(4)              | crystal water |
| Na1 --O8_a                                  | 2.408(3)              | crystal water |
| Na1 --O3_b                                  | 2.430(3)              | (P -O)        |
| Na1 --O11_b                                 | 2.456(4)              | crystal water |

**Table S2.** The hydrogen bond information of the Forms I-IV.

| D-H..A*                  | D(D-H) / Å | d(H..A) / Å | d(D..A) / Å | <DHA>  |
|--------------------------|------------|-------------|-------------|--------|
| cAMPNa·2H <sub>2</sub> O |            |             |             |        |
| OW -- HWB .. O2          | 0.8500     | 2.4200      | 3.061(10)   | 133.00 |
| OW -- HWA .. N3          | 0.8500     | 2.5300      | 3.361(17)   | 166.00 |
| N4 -- H4A .. O6          | 0.8600     | 2.4300      | 3.210(8)    | 150.00 |
| N4 -- H4B .. O2          | 0.8600     | 2.5600      | 3.011(10)   | 114.00 |

|                          |                |        |        |           |        |
|--------------------------|----------------|--------|--------|-----------|--------|
| N4                       | -- H4B .. O4   | 0.8600 | 2.2200 | 3.066(10) | 167.00 |
| O6                       | -- H6A .. O3   | 0.8200 | 1.7900 | 2.602(8)  | 172.00 |
| O7                       | -- H7B .. N2   | 0.8500 | 2.4100 | 2.948(9)  | 122.00 |
| O7                       | -- H7C .. O6   | 0.8500 | 2.5600 | 3.394(7)  | 168.00 |
| O7                       | -- H7C .. O3   | 0.8500 | 2.5600 | 2.929(7)  | 107.00 |
| C5                       | -- H5B .. O1   | 0.9800 | 2.5200 | 3.359(8)  | 144.00 |
| C10                      | -- H10A .. OW  | 0.9300 | 2.5400 | 3.411(18) | 157.00 |
| cAMPNa·4H <sub>2</sub> O |                |        |        |           |        |
| N1                       | -- H1A .. O18  | 0.8600 | 2.1100 | 2.927(3)  | 159.00 |
| N1                       | -- H1B .. N7   | 0.8600 | 2.1100 | 2.929(3)  | 158.00 |
| O1                       | -- H1C .. N8   | 0.8200 | 1.8900 | 2.700(3)  | 171.00 |
| N6                       | -- H6A .. N5   | 0.8600 | 2.3100 | 3.171(3)  | 177.00 |
| N6                       | -- H6B .. O13  | 0.8600 | 2.2000 | 3.024(3)  | 161.00 |
| O7                       | -- H7A .. N3   | 0.8200 | 2.0700 | 2.874(3)  | 167.00 |
| O13                      | -- H13A .. O2  | 0.8300 | 2.2200 | 2.944(2)  | 146.00 |
| O13                      | -- H13B .. O19 | 0.8100 | 2.3600 | 3.153(3)  | 165.00 |
| O14                      | -- H14A .. O17 | 0.9500 | 1.8400 | 2.768(3)  | 166.00 |
| O14                      | -- H14B .. N10 | 0.9000 | 1.9500 | 2.827(3)  | 165.00 |
| O15                      | -- H15A .. O3  | 0.9600 | 2.3400 | 3.132(3)  | 140.00 |
| O15                      | -- H15B .. O20 | 0.8300 | 2.0300 | 2.847(4)  | 168.00 |
| O16                      | -- H16A .. O12 | 0.9000 | 2.0000 | 2.884(3)  | 166.00 |
| O16                      | -- H16B .. O9  | 0.8000 | 2.2000 | 2.906(2)  | 149.00 |
| O17                      | -- H17B .. O4  | 0.8600 | 2.0500 | 2.886(3)  | 164.00 |
| O18                      | -- H18A .. O1  | 0.9000 | 2.2500 | 3.046(2)  | 148.00 |
| O18                      | -- H18A .. O6  | 0.9000 | 2.3200 | 3.035(2)  | 136.00 |
| O18                      | -- H18B .. O4  | 0.8900 | 1.9200 | 2.772(2)  | 161.00 |
| O19                      | -- H19A .. O14 | 1.0300 | 1.7800 | 2.785(3)  | 165.00 |
| O19                      | -- H19C .. O11 | 0.8700 | 1.9500 | 2.815(3)  | 171.00 |
| O20                      | -- H20C .. O11 | 0.9700 | 1.8400 | 2.799(3)  | 170.00 |
| O20                      | -- H20D .. O4  | 0.9300 | 1.9700 | 2.895(3)  | 173.00 |
| C1                       | -- H1 .. O10   | 0.9300 | 2.4900 | 3.258(3)  | 140.00 |
| C5                       | -- H5 .. O19   | 0.9300 | 2.4800 | 3.367(3)  | 160.00 |
| C14                      | -- H14 .. O15  | 0.9300 | 2.5700 | 3.466(3)  | 163.00 |
| cAMPNa·5H <sub>2</sub> O |                |        |        |           |        |
| N1                       | -- H1A .. O1   | 0.8900 | 2.2200 | 3.070(4)  | 159.00 |
| O2                       | -- H2A .. N5   | 0.8200 | 2.1100 | 2.928(4)  | 173.00 |
| O7                       | -- H7A .. O8   | 0.8500 | 2.2100 | 2.757(6)  | 122.00 |
| O7                       | -- H7B .. O3   | 0.8600 | 2.3300 | 3.087(5)  | 146.00 |
| O7                       | -- H7B .. O6   | 0.8600 | 2.4200 | 3.014(4)  | 127.00 |
| O8                       | -- H8A .. O7   | 0.8500 | 2.4100 | 2.757(6)  | 105.00 |
| O8                       | -- H8B .. N2   | 0.8400 | 2.3400 | 3.025(5)  | 139.00 |
| O9                       | -- H9A .. O4   | 0.8500 | 2.2200 | 3.012(4)  | 155.00 |
| O10                      | -- H10C .. O11 | 0.7000 | 2.1300 | 2.831(5)  | 174.00 |
| O10                      | -- H10D .. O7  | 0.7600 | 2.1200 | 2.865(5)  | 169.00 |
| O11                      | -- H11A .. O6  | 1.0100 | 1.8000 | 2.795(5)  | 166.00 |
| O11                      | -- H11B .. O9  | 0.8200 | 2.6000 | 3.298(6)  | 144.00 |
| C2                       | -- H2 .. O2    | 0.9300 | 2.5600 | 3.293(5)  | 136.00 |
| C4                       | -- H4 .. O7    | 0.9300 | 2.4200 | 3.239(5)  | 147.00 |
| C6                       | -- H6 .. N3    | 0.9800 | 2.5800 | 3.015(4)  | 107.00 |

|                                              |         |       |        |        |          |        |
|----------------------------------------------|---------|-------|--------|--------|----------|--------|
| C8                                           | -- H8   | .. O7 | 0.9800 | 2.5800 | 3.378(5) | 139.00 |
| C10                                          | -- H10B | .. O2 | 0.9700 | 2.5400 | 3.431(5) | 152.00 |
| cAMPNa· CH <sub>3</sub> OH·3H <sub>2</sub> O |         |       |        |        |          |        |
| O1                                           | -- H1   | .. N5 | 0.8200 | 2.0800 | 2.891(4) | 168.00 |
| N1                                           | -- H1B  | .. N3 | 0.8900 | 2.5700 | 3.088(4) | 118.00 |
| O7                                           | -- H7A  | .. O4 | 0.9200 | 1.8000 | 2.691(5) | 164.00 |
| O7                                           | -- H7B  | .. O3 | 0.8700 | 1.9800 | 2.782(5) | 153.00 |
| O8                                           | -- H8A  | .. O7 | 0.8000 | 1.9500 | 2.730(4) | 163.00 |
| O8                                           | -- H8B  | .. O9 | 0.8800 | 2.0400 | 2.884(5) | 161.00 |
| O9                                           | -- H9A  | .. O3 | 0.8200 | 2.1700 | 2.921(5) | 152.00 |
| O9                                           | -- H9A  | .. O6 | 0.8200 | 2.5500 | 3.254(5) | 145.00 |
| O11                                          | -- H11D | .. O5 | 0.8800 | 2.1600 | 2.991(4) | 158.00 |
| O11                                          | -- H11E | .. O7 | 0.8300 | 2.1300 | 2.850(5) | 146.00 |
| C2                                           | -- H2   | .. O1 | 0.9300 | 2.5500 | 3.297(5) | 138.00 |
| C6                                           | -- H6   | .. N3 | 0.9800 | 2.5800 | 3.007(4) | 106.00 |
| C8                                           | -- H8   | .. O9 | 0.9800 | 2.5400 | 3.323(5) | 137.00 |

Note: \*D=Donor, A=Acceptor; Hydrogen bonds with H..A < r(A) + 2.000 Angstroms and <DHA > more than 110 deg.

## Reference

- (1) Yang, P.; Lin, C.; Zhuang, W.; Wen, Q.; Zou, F.; Zhou, J.; Wu, J.; Ying, H., Insight into a direct solid-solid transformation: a potential approach for the removal of residual solvents. *CrystEngComm* **2016**, 18, (10), 1699-1704.
